# Supplementary material for: Orderly Porous Covalent Organic Frameworks-based Materials: Superior Adsorbents for Pollutants Removal from Aqueous Solutions
Source: PubMed Central journal article supplement — Innovation (Camb). 2021 Jan 5;2(1):100076. doi: 10.1016/j.xinn.2021.100076 (PMC8454561; doi:10.1016/j.xinn.2021.100076), 2021-01-05
Supplement: mmc1.pdf [file mmc1.pdf]

**The Innovation, Volume 2**

**Supplemental Information**

**Orderly Porous Covalent Organic**

**Frameworks-based Materials: Superior Adsorbents**

**for Pollutants Removal from Aqueous Solutions**

**Xiaolu Liu, Hongwei Pang, Xuewei Liu, Qian Li, Ning Zhang, Liang Mao, Muqing Qiu, Baowei Hu, Hui Yang, and Xiangke Wang**

Supplementary Information for

**Orderly porous covalent organic frameworks-based materials: superior adsorbents for pollutants removal from aqueous solutions**

Xiaolu Liu<sup>1,2</sup>, Hongwei Pang<sup>2</sup>, Xuewei Liu<sup>2</sup>, Qian Li<sup>2</sup>, Ning Zhang<sup>2</sup>, Liang Mao<sup>3</sup>,  
Muqing Qiu<sup>1</sup>, Baowei Hu<sup>1,\*</sup>, Hui Yang<sup>2,\*</sup>, Xiangke Wang<sup>2\*</sup>

1. School of Life Science, Shaoxing University, Huancheng West Road 508, Shaoxing, 312000, P.R. China

2. College of Environmental Science and Engineering, North China Electric Power University, Beijing, 102206, P.R. China

3. State Key Laboratory of Pollution Control and Resource Reuse, School of the Environment, Nanjing University, Nanjing, 210093, P.R. China

\*: Corresponding author. Email: [xkwang@ncepu.edu.cn](mailto:xkwang@ncepu.edu.cn) (X. Wang),  
[h.yang@ncepu.edu.cn](mailto:h.yang@ncepu.edu.cn) (H. Yang); [hbw@usx.edu.cn](mailto:hbw@usx.edu.cn) (B. Hu).

**Contents:**

Supplementary Figures: 1

Supplementary Tables: 2

References for SI reference citations

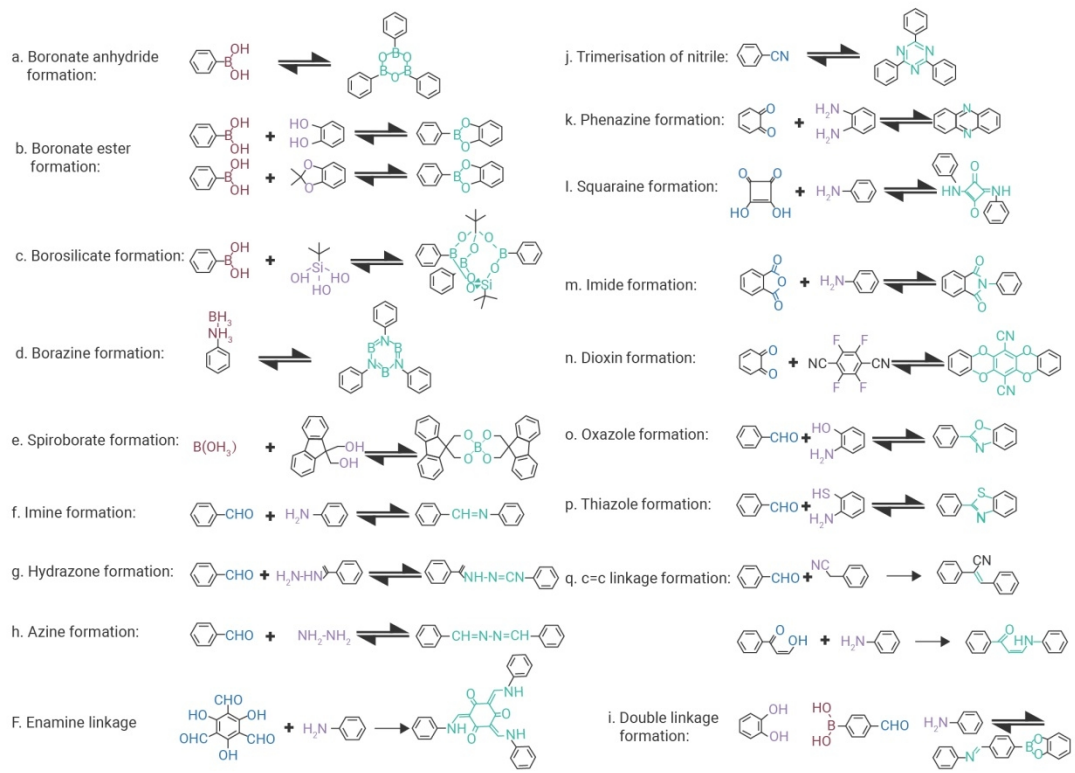

**Fig. S1.** Various linkages of COF formation<sup>1</sup>.

**Table S1** The typical kinetic and thermodynamic models commonly used to describe the adsorption process by COF-based materials.

|                           | Equation                                                       | Parameters                                                                                                                                                                                                                                                                                                                                                         | Ref     |
|---------------------------|----------------------------------------------------------------|--------------------------------------------------------------------------------------------------------------------------------------------------------------------------------------------------------------------------------------------------------------------------------------------------------------------------------------------------------------------|---------|
| <b>Isotherm models</b>    |                                                                |                                                                                                                                                                                                                                                                                                                                                                    |         |
| Langmuir model            | $C_e/q_e = 1/(K_L q_m) + C_e/q_m$<br>$R_L = 1/(1 + K_L C_0)$   | $C_e$ (mg·L <sup>-1</sup> ) equilibrium concentration;<br>$q_e$ (mg·g <sup>-1</sup> ) adsorption capacity at equilibrium time;<br>$K_L$ (L·mg <sup>-1</sup> ) the Langmuir constant;<br>$q_m$ (mg·g <sup>-1</sup> ) the maximum adsorption capacity;<br>$R_L$ the dimensionless parameter;<br>$C_0$ (mg·L <sup>-1</sup> ) highest concentration of the adsorbates; | 2,<br>3 |
| Freundlich model          | $\ln q_e = \ln K_F + \ln C_e/n$                                | $K_F$ (mg·L <sup>-1</sup> ) the Freundlich constant;<br>n-a constant describing the adsorption density;                                                                                                                                                                                                                                                            | 2       |
| Dubinin-Radushkevich      | $\ln q_e = \ln q_m - K \varepsilon^2$<br>$E_D = 1/ (2K)^{1/2}$ | $K$ (mol <sup>2</sup> /J <sup>2</sup> ) a constant;<br>$\varepsilon$ -the Polanyi potential;<br>$E_D$ (KJ·mol <sup>-1</sup> )                                                                                                                                                                                                                                      | 4       |
| Temkin                    | $q_e = (R^*T/b_T) \ln K_T + (R^*T/b_T) \ln C_e$                | $K_T$ (L·g <sup>-1</sup> ) Temkin constant;<br>$R$ (J/mol·K) constant 8.314;<br>$b_T$ (KJ·mol <sup>-1</sup> ) Temkin constant related to the heat of adsorption                                                                                                                                                                                                    | 5       |
| Sips model                | $q_e = q_m (K C_e)^n / [1 + (K C_e)^n]$                        | $k$ ((mg·L <sup>-1</sup> ) <sup>-n</sup> ) the constant of the sips models;<br>n-the index of heterogeneity                                                                                                                                                                                                                                                        | 6       |
| <b>Kinetic models</b>     |                                                                |                                                                                                                                                                                                                                                                                                                                                                    |         |
| Pseudo first-order model  | $\ln[(q_e - q_t)/q_e] = -K_1 q_e t$                            | $q_t$ (mg·g <sup>-1</sup> ) the adsorption capacity at the time t;<br>$K_1$ (min <sup>-1</sup> ) pseudo-first-order rate constant of the adsorption;                                                                                                                                                                                                               | 5       |
| Pseudo second-order model | $t/q_t = t/q_m + 1/(K_2 q_e^2)$                                | $K_2$ (g·mg <sup>-1</sup> ·min <sup>-1</sup> ) pseudo-second-order rate constant of the adsorption                                                                                                                                                                                                                                                                 | 5       |

---

|                               |                                                                                       |                                                                                                                                                                                                                                                                                                                               |   |
|-------------------------------|---------------------------------------------------------------------------------------|-------------------------------------------------------------------------------------------------------------------------------------------------------------------------------------------------------------------------------------------------------------------------------------------------------------------------------|---|
| Intraparticle diffusion model | $q_t = K_i t^{1/2} + C$                                                               | $K_i$ (mg·g <sup>-1</sup> ·min <sup>-1/2</sup> ) the intraparticle diffusion rate constant;<br>C the intercept related to the boundary thickness                                                                                                                                                                              | 4 |
| Elovich model                 | $q_t = \ln(\alpha\beta)/\beta + \ln(t)/\beta$                                         | $\alpha$ -the initial adsorption rate; $\beta$ -the desorption constant                                                                                                                                                                                                                                                       | 4 |
| Thermodynamic model           | $K_0 = q_e/C_e$<br>$\Delta G = -RT \ln K_0$<br>$\ln K_0 = \Delta S/R - \Delta H/(RT)$ | entropy change ( $\Delta S$ , J·mol <sup>-1</sup> K <sup>-1</sup> );<br>free energy change ( $\Delta G$ , kJ·mol <sup>-1</sup> );<br>enthalpy change ( $\Delta H$ , kJ·mol <sup>-1</sup> );<br>the thermodynamic equilibrium constant ( $K^0$ );<br>the universal gas constant (R 8.314 J·mol <sup>-1</sup> K <sup>-1</sup> ) | 7 |

---

**Table S2** Abbreviations.

|                                                                     |                                                                                                                |
|---------------------------------------------------------------------|----------------------------------------------------------------------------------------------------------------|
| (CP/MAS) NMRs                                                       | The solid-state <sup>13</sup> C cross-polarization magic-angle-spinning (CP/MAS) NMR spectroscopy              |
| [NH <sub>4</sub> <sup>+</sup> ] [COF-SO <sub>3</sub> <sup>-</sup> ] | SO <sub>3</sub> <sup>-</sup> -anchored COF                                                                     |
| [P(O <sub>2</sub> Ph) <sub>3</sub> ] <sup>-</sup>                   | Hexa-coordinated phosphorus moieties                                                                           |
| 2D                                                                  | Two-dimensional                                                                                                |
| 3D                                                                  | Three-dimensional                                                                                              |
| 3D ionic COFs                                                       | Tetrakis (4-formylphenyl) methane + diimidium bromide                                                          |
| ACOF                                                                | Azine-linked COF                                                                                               |
| ACs                                                                 | Activated carbons                                                                                              |
| Ag NPs@COF                                                          | Ag nanoparticles@COF                                                                                           |
| Ag NPs@COF-LZU1                                                     | COF-supported Ag NPs material                                                                                  |
| BD                                                                  | benzidine                                                                                                      |
| BD-(CF <sub>3</sub> ) <sub>2</sub>                                  | 3,3'-bis(trifluoromethyl)benzidine                                                                             |
| BFBP2 + 2Cl <sup>-</sup>                                            | 1,1-bis(4-formylphenyl)-4,4'-bipyridinium dichloride                                                           |
| BG                                                                  | brilliant green                                                                                                |
| BIPY                                                                | bipyridine                                                                                                     |
| BPA                                                                 | Bisphenol A                                                                                                    |
| CMPs                                                                | Conjugated microporous polymers                                                                                |
| CNFs                                                                | Carbon nanofibers                                                                                              |
| CNTs                                                                | Carbon nanotubes                                                                                               |
| COF1                                                                | 1,3,5-triaminobenzene (TAB) + 2,3-dihydroxyterephthalaldehyde (2,3-Dha)                                        |
| COF-102                                                             | tetra-boronic acid + allyl-functionalized truncating                                                           |
| COF-103                                                             | tetra(4-(dihydroxy)borylphenyl) silane                                                                         |
| COF2                                                                | 1,3,5-triaminobenzene (TAB) + 2,5-dihydroxyterephthalaldehyde (2,5-Dha)                                        |
| COF-366-Co                                                          | 5,10,15,20-tetrakis(4-aminophenyl) porphinato] cobalt [Co(TAP)] + 1,4-benzenedi carboxaldehyde                 |
| COF-BTA-DHBZ                                                        | 3,3'-dihydroxybenzidine (DHBZ) + [1,1'-biphenyl]-3,3',5,5'-tetracarbaldehyde (BTA)                             |
| COF-COOH                                                            | carboxyl-containing COF                                                                                        |
| COF-ETTA-2,3-Dha                                                    | 4,4',4'',4'''-(ethene-1,1,2,2-tetrayl)tetraaniline (ETTA) + 2,3-dihydroxybenzene-1,4-dicarbaldehyde (2,3-Dha)) |
| COF-LZU8                                                            | Thioether-functionalized hydrazone-linked COF                                                                  |
| COF-LZU8                                                            | Thioether-functionalized hydrazone-linked COF                                                                  |
| COFs                                                                | Covalent organic frameworks                                                                                    |
| COF-SH                                                              | Sulfhydryl functionalized COF                                                                                  |
| COF-S-SH                                                            | Sulfur-based chelating-group-laced COF                                                                         |
| COF-S-SH                                                            | Thiol-functionalized COF                                                                                       |
| COF-TE                                                              | Amide-rich layered COF (1,3,5-trimesoyl chloride + p-Phenylenediamine)                                         |

|                                           |                                                                                                                                                                                    |
|-------------------------------------------|------------------------------------------------------------------------------------------------------------------------------------------------------------------------------------|
| COF-TP                                    | Amide-rich layered COF (1,3,5-trimesoyl chloride + p-Phenylenediamine)                                                                                                             |
| COF-TpPa-1                                | COF-2,4,6-Triformylphloroglucinol pPhenylenediamine                                                                                                                                |
| COF-TpPa-1-nc                             | 1, 3, 5-triformylphloroglucinol+ p-phenylenediamine                                                                                                                                |
| COF-V (synthesized by Li et al.)          | Vinyl-incorporated COF (2,5-Divinylterephthalaldehyde (DVA) + 1,3,5-tris(4"-aminobiphenyl)benzene (TABPB))                                                                         |
| COF-V (synthesized by Sun et al.)         | Vinyl-functionalized COF (2,5-divinylterephthalaldehyde (Dva) + 1,3,5-tris(4-aminophenyl)-benzene (Tab))                                                                           |
| COM                                       | COF membrane                                                                                                                                                                       |
| COOH@COF                                  | Carboxyl functionalized COF                                                                                                                                                        |
| CR                                        | Congo red                                                                                                                                                                          |
| CTX                                       | cefotaxime                                                                                                                                                                         |
| CuP-DMNDA-COF                             | Imine-linked functionalized COFs                                                                                                                                                   |
| CuTAPP                                    | 5,10,15,20-tetra(p-aminophenyl) porphyrinatocopper(II)                                                                                                                             |
| CV                                        | crystal violet                                                                                                                                                                     |
| DBA                                       | 4,4'-diamino-[1,1'-biphenyl]-3,3'-dicarboxylic acid                                                                                                                                |
| DBd                                       | 4,4'-diamino-[1,1'-biphenyl]-2,2'-dicarboxylic acid                                                                                                                                |
| DCC                                       | Dynamic covalent chemistry                                                                                                                                                         |
| DFS-4BS                                   | direct fast scarlet 4BS                                                                                                                                                            |
| DFT                                       | Density functional theory                                                                                                                                                          |
| DHBD                                      | 3,3'-dihydroxybenzidine                                                                                                                                                            |
| DMBD                                      | 2,2'-dimethyl-[1,1'-biphenyl]-4,4'-diamine-COF                                                                                                                                     |
| DMNDA                                     | 2,6-dimethoxynaphthalene-1,5-dicarbaldehyde                                                                                                                                        |
| DMTA                                      | 2,5-dimethoxyterephthalaldehyde                                                                                                                                                    |
| DMTP                                      | dimethoxyterephthalaldehyde                                                                                                                                                        |
| DT                                        | 4,4"-diamino-pterphenyl                                                                                                                                                            |
| EB-COF:Br                                 | 1,3,5-trifomyphloroglucinol (TFP) + ethidium bromide (EB)                                                                                                                          |
| EDC                                       | endocrine-disrupting chemicals                                                                                                                                                     |
| EIS                                       | electrochemical impedancespectroscopy                                                                                                                                              |
| EPA                                       | Environmental Protection Agency                                                                                                                                                    |
| EXAFS                                     | Extended X-ray absorption fine structure spectroscopy                                                                                                                              |
| Fe <sup>0</sup> /TAPB-PDA COFs composites | 1,3,5-tris(4-aminophenyl)benzene (TAPB) + terephthalaldehyde (PDA) + zero-valent iron (Fe <sup>0</sup> ) nanoparticles                                                             |
| Fe <sub>3</sub> O <sub>4</sub> @TpPa-1    | 1,4-diaminobenzene (Pa-1) + 1, 3, 5-triformylphloroglucinol (Tp) + amino-functionalized magnetic Fe <sub>3</sub> O <sub>4</sub> (Fe <sub>3</sub> O <sub>4</sub> -NH <sub>2</sub> ) |
| FT-IR                                     | Fourier transform infrared spectroscopy                                                                                                                                            |
| g-C <sub>3</sub> N <sub>4</sub>           | Graphitic carbon nitride                                                                                                                                                           |
| GenX                                      | ammonium perfluoro-2-propoxypropionate                                                                                                                                             |
| GO                                        | Graphene oxides                                                                                                                                                                    |
| IARC                                      | International Agency for Research on Cancer                                                                                                                                        |
| IAST                                      | A method established for evaluation of metal ion uptakes by variety of adsorbents                                                                                                  |

|                    |                                                                                                                                                                                                                                                              |
|--------------------|--------------------------------------------------------------------------------------------------------------------------------------------------------------------------------------------------------------------------------------------------------------|
| Kd                 | Constant of distribution, L/g                                                                                                                                                                                                                                |
| Ksp                | The solubility product constant, Ksp, is the equilibrium constant for a solid substance dissolving in an aqueous solution. It represents the level at which a solute dissolves in solution. The more soluble a substance is, the higher the Ksp value it has |
| LDHs               | Layered double hydroxides                                                                                                                                                                                                                                    |
| LMS                | Layered metal sulfides                                                                                                                                                                                                                                       |
| M18                | monolith with 16% COF powder                                                                                                                                                                                                                                 |
| M28                | monolith with 28% COF powder                                                                                                                                                                                                                                 |
| MB                 | Methylene blue                                                                                                                                                                                                                                               |
| M-COF              | Melamine-based COF                                                                                                                                                                                                                                           |
| M-COF-SH           | Thiol-functionalized COF composite                                                                                                                                                                                                                           |
| MO                 | Methyl orange                                                                                                                                                                                                                                                |
| MOFs               | Metal organic frameworks                                                                                                                                                                                                                                     |
| MSPE               | magnetic solid-phase extraction                                                                                                                                                                                                                              |
| MW                 | molecular weight                                                                                                                                                                                                                                             |
| NACs               | nitroaromatic compounds                                                                                                                                                                                                                                      |
| NCCT               | NiFe <sub>2</sub> O <sub>4</sub> /COF/CS/TPA nanocomposites film                                                                                                                                                                                             |
| ND                 | 1,5-naphalenediamine                                                                                                                                                                                                                                         |
| NZVI               | Nanoscale zero-valent iron                                                                                                                                                                                                                                   |
| OA                 | okadaic acid                                                                                                                                                                                                                                                 |
| OMC                | Ordered mesoporous carbon                                                                                                                                                                                                                                    |
| Pa-2               | p-phenylenediamine (2,5-dimethyl-pphenylenediamine)                                                                                                                                                                                                          |
| PAHs               | Polycyclic aromatic hydrocarbon                                                                                                                                                                                                                              |
| PA-POFs            | COFs with tetra-coordinated phosphate functional groups                                                                                                                                                                                                      |
| PDA                | p-phenylenediamine                                                                                                                                                                                                                                           |
| PFAS               | Per-/polyfluorinated alkyl substances                                                                                                                                                                                                                        |
| PFOA               | perfluorooctanoic acid                                                                                                                                                                                                                                       |
| pHzpc              | The pH at zero-point charge                                                                                                                                                                                                                                  |
| POFct-1            | 3D porous organic framework (crystal-type)                                                                                                                                                                                                                   |
| POFct-2            | 3D porous organic framework (amorphous)                                                                                                                                                                                                                      |
| POPs               | Persistent organic pollutants                                                                                                                                                                                                                                |
| PPCPs              | pharmaceutical and personal care products                                                                                                                                                                                                                    |
| PTSA               | ptoluene sulfonic acid                                                                                                                                                                                                                                       |
| P-WCA-POFs         | COFs with hexa-coordinated phosphorus moieties                                                                                                                                                                                                               |
| PXRD               | powder X-ray diffraction pattern                                                                                                                                                                                                                             |
| QG-scaffolded COFs | Q-graphene (QG) + melanine (MA) + paraformaldehyde (PA) + phenol (Phen)                                                                                                                                                                                      |
| RhB                | Rhodamine B                                                                                                                                                                                                                                                  |
| SA                 | succinic anhydride                                                                                                                                                                                                                                           |
| SAXS               | Small-angle X-ray scattering                                                                                                                                                                                                                                 |
| SMT                | Sulfamerazine                                                                                                                                                                                                                                                |
| SNW-1              | Schiff-based networks                                                                                                                                                                                                                                        |



|                 |                                                                                                                                                                                                 |
|-----------------|-------------------------------------------------------------------------------------------------------------------------------------------------------------------------------------------------|
| TAPB            | 1,3,5-tris(4-aminophenyl) benzene                                                                                                                                                               |
| TAPB-BMTPA-COF  | 1,3,5-tris(4-aminophenyl)benzene (TAPB) +<br>2,5-bis(methylthio)terephthalaldehyde (BMTPA)                                                                                                      |
| TC              | Tetracycline                                                                                                                                                                                    |
| TCC             | Triclocarban                                                                                                                                                                                    |
| TCOF/ T-COF     | Triazine-based COF                                                                                                                                                                              |
| TCS             | Triclosan                                                                                                                                                                                       |
| TFBODH          | Oxalyldihydrazide (ODH) + 1,3,5-triformylbenzene (TFB)                                                                                                                                          |
| TFP             | 1,3,5-Triformylphloroglucinol                                                                                                                                                                   |
| TFPM            | tetra(4-formylphenyl)methane                                                                                                                                                                    |
| TFPOT           | 1,3,5-triazine and 2,4,6-tris(4-formylphenoxy)-1,3,5-triazine                                                                                                                                   |
| TFPPy-CHYD      | 1,3,6,8-tetrakis(4-formylphenyl)pyrene (TFPPy) + carbonyldiimidazole (CHYD)                                                                                                                     |
| TFPT-COF        | 1,3,5-tris-(4-formyl-phenyl)triazine(TFPT)+<br>2,5-diethoxy-terephthalohydrazide                                                                                                                |
| TGA             | Thermogravimetric analysis                                                                                                                                                                      |
| TP              | 2,4,6-triformylphloroglucinol                                                                                                                                                                   |
| TPA             | terephthalaldehyde                                                                                                                                                                              |
| TPB             | 1,3,5-tri-(4-aminophenyl)benzene                                                                                                                                                                |
| TPBD            | 1,3,5-triformylphloroglucinol and benzidine                                                                                                                                                     |
| TPB-DMTP-COF-SH | triazole and thiol groups-functionalized COF<br>(2,5-dimethoxyterephthalaldehyde (DMTA) +<br>2,5-bis(prop-2-in-1-yloxy)terephthalaldehyde (BPTA) +<br>1,3,5-Tris-(4-aminophenyl)benzene (TAPB)) |
| TPhP            | Triphenyl phosphate                                                                                                                                                                             |
| TPND            | a COF synthesized with TP and ND                                                                                                                                                                |
| TPODH           | Oxalyldihydrazide (ODH) + 1,3,5-triformylphloroglucinol (TP)                                                                                                                                    |
| TPa-NH2@EDTA    | EDTA-functionalized COF (triformylphloroglucinol (TP) +<br>2-nitrobenzene-1,4-diamine (Pa-NO2) + ethylenediaminetetraacetic<br>dianhydride (EDTA dianhydride))                                  |
| TPT-CHO         | 2,4,6-tris(p-formylphenoxy)-1,3,5-triazine                                                                                                                                                      |
| TS-COF-1        | Triazine-polyimide-COF                                                                                                                                                                          |
| TS-COF-2        | Task-specific Triazine-Schiff base-COF                                                                                                                                                          |
| TTB-COF         | Thioether-functionalized COF (2,5-bis(2-(ethylthio)ethoxy)<br>terephthalohydrazide (BETH) + 1,3,5-triformylbenzene (TFB))                                                                       |
| Tz              | 1,3,5-tris(4-formyl-phenyl) triazine                                                                                                                                                            |
| TzDBd           | 1,3,5-tris(4-formyl-phenyl) triazine +<br>4,4'-diamino-[1,1'-biphenyl]-2,2'-dicarboxylic acid                                                                                                   |
| U.S. EPA        | The United States Environmental Protection Agency                                                                                                                                               |
| VSM             | vibrating sample magnetometer                                                                                                                                                                   |
| WHO             | World Health Organization                                                                                                                                                                       |
| XAFS            | X-ray absorption fine structure                                                                                                                                                                 |
| XANES           | X-ray absorption near-edge structure spectroscopy                                                                                                                                               |

|                |                                  |
|----------------|----------------------------------|
| XPS            | X-ray photoelectron spectroscopy |
| $\lambda_{ex}$ | Wave length of external UV       |

## Reference

- [1] Wang, H., Wang, H., Wang, Z.W., Tang, L., Zeng, G.M., Xu, P., Chen, M., Xiong, T., Zhou, C.Y., Li, X.Y., et al. (2020). Covalent organic framework photocatalysts: structures and applications. *Chem. Soc. Rev.* 49, 4135-4165.
- [2] Huo, J., Luo, B., and Chen, Y. (2019). Crystalline covalent organic frameworks from triazine nodes as porous adsorbents for dye pollutants. *ACS Omega.* 4, 22504-22513.
- [3] Lu, X.F., Ji, W.H., Yuan, L., Yu, S., and Guo, D.S. (2019). Preparation of carboxy-functionalized covalent organic framework for efficient removal of  $Hg^{2+}$  and  $Pb^{2+}$  from water. *Ind. Eng. Chem. Res.* 58, 17660-17667.
- [4] Firoozi, M., Rafiee, Z., and Dashtian, K. (2020). New MOF/COF hybrid as a robust adsorbent for simultaneous removal of Auramine O and Rhodamine B dyes. *ACS Omega.* 5, 9420-9428.
- [5] Dinari, M., and Hatami, M. (2019). Novel N-riched crystalline covalent organic framework as a highly porous adsorbent for effective cadmium removal. *J. Environ. Chem. Eng.* 7, 102907.
- [6] Zhuang, S.T., Chen, R., Liu, Y., and Wang, J.L. (2020). Magnetic COFs for the adsorptive removal of diclofenac and sulfamethazine from aqueous solution: Adsorption kinetics, isotherms study and DFT calculation. *J. Hazard. Mater.* 385, 121596.

- [7] Li, Y., Yang, C.X., Qian, H.L., Zhao, X., and Yan, X.P. (2019). Carboxyl-functionalized covalent organic frameworks for the adsorption and aemoval of triphenylmethane dyes. *ACS Appl Nano Mater.* 2, 7290-7298.
